# Supplementary material
Source: Copernicus journal article supplement (doi:10.5194/egqsj-16-47-1965)

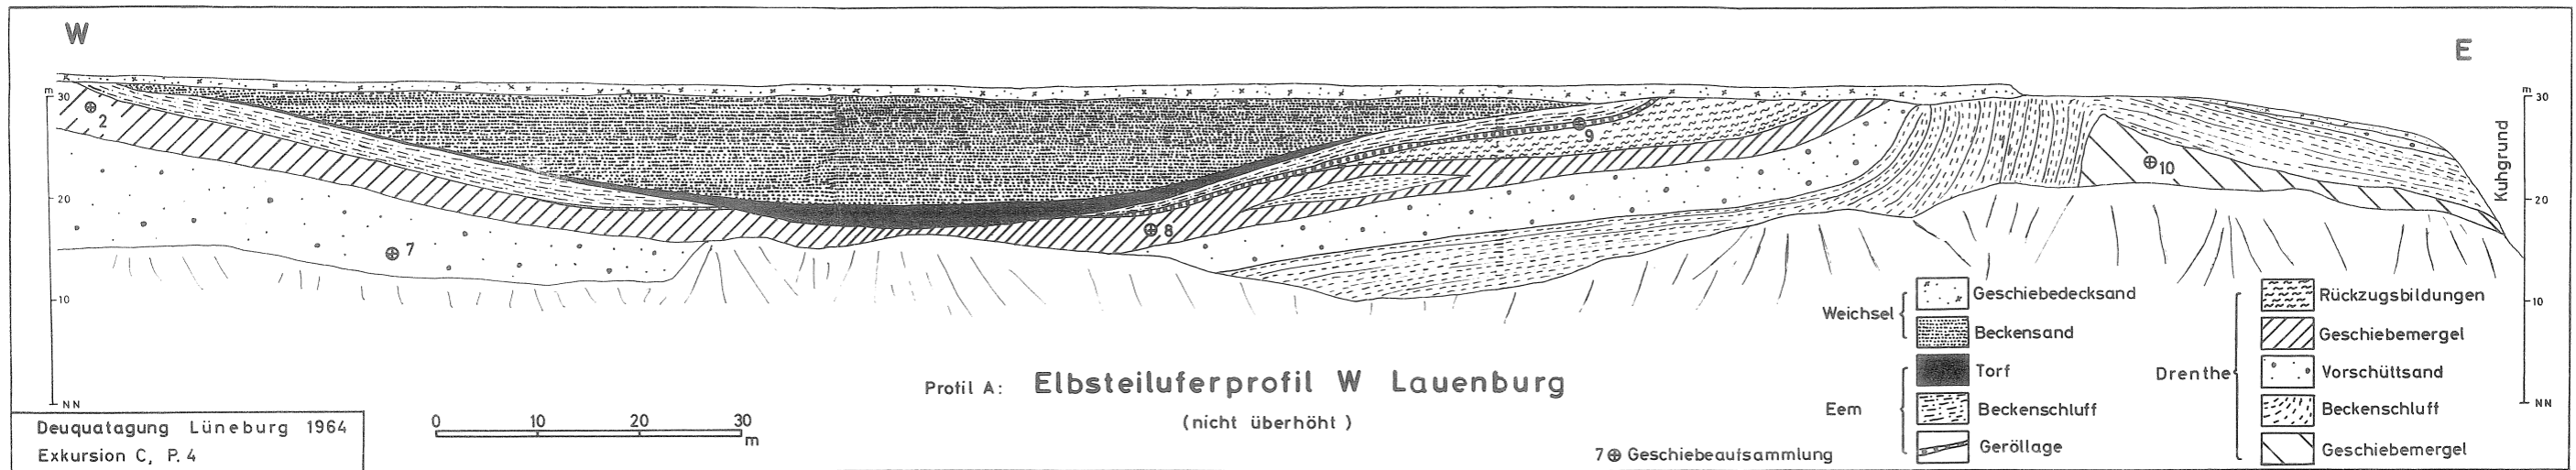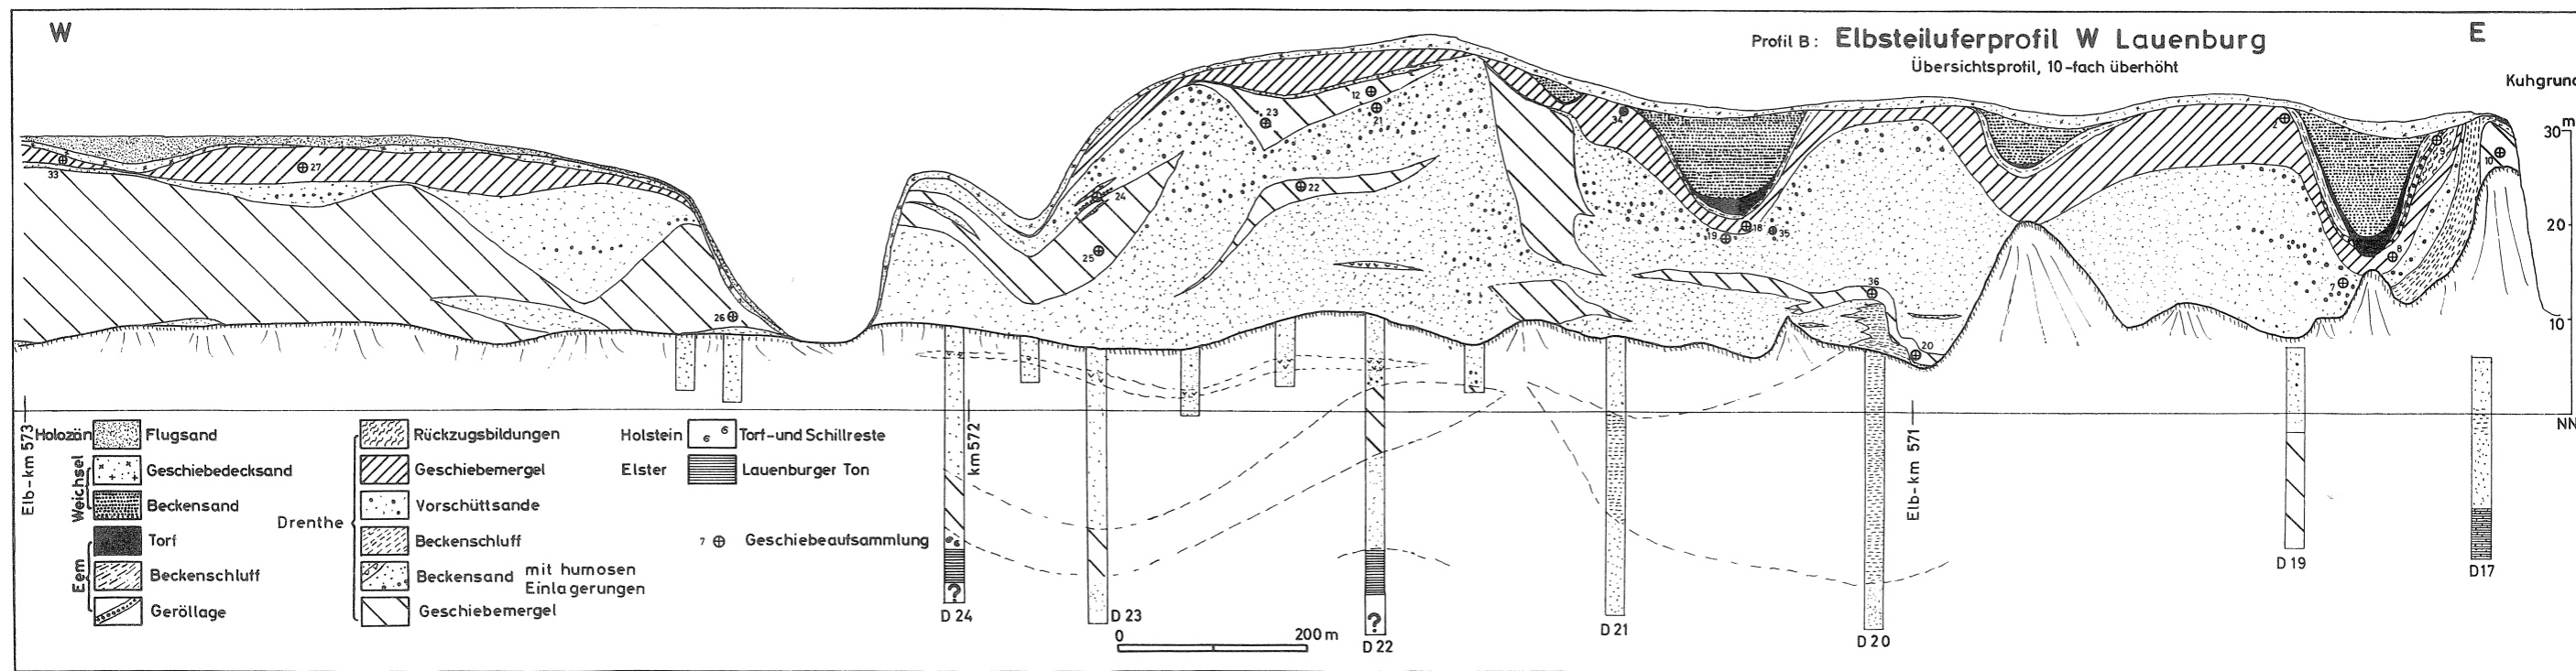

Supplement: Supplementary file 1 [file egqsj-16-47-1965-supplement.pdf]
